# Supplementary material
Source: MDPI journal article supplement (https://www.mdpi.com/2073-445X/13/5/690)
Supplement: s1 [file s1]

Table S1 Percentage reflectance of vegetation and soil at a 0.5 km distance in different directions of AWP in 2002 and 2012

| Feature         | 2002 |       |      |      |                   |                   |
|-----------------|------|-------|------|------|-------------------|-------------------|
|                 | Blue | Green | Red  | NIR  | SWIR <sub>1</sub> | SWIR <sub>2</sub> |
| Vegetation (NE) | 34.5 | 30.6  | 36.9 | 28.2 | 55.7              | 34.5              |
| Soil (NE)       | 44.7 | 40.0  | 47.5 | 27.8 | 71.0              | 62.0              |
| Vegetation (N)  | 34.9 | 31.8  | 36.5 | 27.8 | 54.9              | 38.0              |
| Soil (N)        | 43.9 | 40.4  | 47.5 | 30.2 | 67.5              | 54.9              |
| Vegetation (NW) | 34.5 | 30.2  | 35.7 | 27.5 | 48.6              | 32.5              |
| Soil (NW)       | 44.3 | 40.4  | 49.0 | 30.2 | 64.3              | 52.5              |

  

| Feature         | 2012 |       |      |      |                   |                   |
|-----------------|------|-------|------|------|-------------------|-------------------|
|                 | Blue | Green | Red  | NIR  | SWIR <sub>1</sub> | SWIR <sub>2</sub> |
| Vegetation (NE) | 31.4 | 27.1  | 30.2 | 27.8 | 43.9              | 25.5              |
| Soil (NE)       | 34.9 | 30.2  | 35.3 | 27.1 | 56.1              | 41.6              |
| Vegetation (N)  | 31.4 | 26.7  | 31.0 | 26.3 | 48.2              | 32.5              |
| Soil (N)        | 34.1 | 30.2  | 34.9 | 26.7 | 53.3              | 40.0              |
| Vegetation (NW) | 31.8 | 27.1  | 30.2 | 27.1 | 44.3              | 29.8              |
| Soil (NW)       | 40.8 | 37.6  | 46.3 | 31.4 | 65.5              | 52.2              |

Table S2 Percentage reflectance of vegetation and soil at a 0.5 km distance in different directions of AWP in 2018, 2020, and 2022

| Feature         | 2018 |       |      |       |                   |                   |
|-----------------|------|-------|------|-------|-------------------|-------------------|
|                 | Blue | Green | Red  | NIR   | SWIR <sub>1</sub> | SWIR <sub>2</sub> |
| Vegetation (NE) | 49.4 | 51.4  | 51.8 | 74.9  | 49.8              | 48.6              |
| Soil (NE)       | 97.3 | 97.6  | 98.0 | 96.9  | 99.2              | 97.6              |
| Vegetation (N)  | 78.0 | 80.0  | 78.0 | 93.7  | 87.5              | 80.0              |
| Soil (N)        | 96.5 | 96.9  | 97.6 | 94.9  | 98.8              | 97.3              |
| Vegetation (NW) | 52.5 | 56.1  | 54.9 | 91.4  | 54.1              | 51.8              |
| Soil (NW)       | 99.6 | 99.6  | 99.2 | 100.0 | 99.2              | 98.8              |

  

| Feature         | 2020 |       |      |      |                   |                   |
|-----------------|------|-------|------|------|-------------------|-------------------|
|                 | Blue | Green | Red  | NIR  | SWIR <sub>1</sub> | SWIR <sub>2</sub> |
| Vegetation (NE) | 54.5 | 56.5  | 54.5 | 89.4 | 54.9              | 50.2              |
| Soil (NE)       | 99.6 | 99.2  | 98.4 | 97.3 | 100.0             | 100.0             |
| Vegetation (N)  | 72.9 | 65.9  | 65.9 | 89.4 | 73.7              | 67.5              |
| Soil (N)        | 96.1 | 94.5  | 94.1 | 88.2 | 98.4              | 99.2              |
| Vegetation (NW) | 83.1 | 78.4  | 70.2 | 98.0 | 78.0              | 77.3              |
| Soil (NW)       | 98.4 | 98.0  | 97.6 | 96.9 | 98.8              | 99.2              |

  

| Feature         | 2022 |       |      |      |                   |                   |
|-----------------|------|-------|------|------|-------------------|-------------------|
|                 | Blue | Green | Red  | NIR  | SWIR <sub>1</sub> | SWIR <sub>2</sub> |
| Vegetation (NE) | 49.0 | 45.9  | 40.8 | 58.4 | 45.9              | 26.3              |
| Soil (NE)       | 51.4 | 48.2  | 43.5 | 58.0 | 51.0              | 30.2              |

|                 |      |      |      |      |      |      |
|-----------------|------|------|------|------|------|------|
| Vegetation (N)  | 51.0 | 47.8 | 43.9 | 61.2 | 49.4 | 29.4 |
| Soil (N)        | 60.0 | 57.6 | 56.5 | 64.7 | 64.7 | 43.1 |
| Vegetation (NW) | 51.4 | 46.3 | 40.8 | 61.2 | 45.9 | 26.7 |
| Soil (NW)       | 62.0 | 60.4 | 58.0 | 65.1 | 62.0 | 41.2 |

Table S3 Percentage reflectance of vegetation and soil at a 1 km distance in different directions of AWP in 2002 and 2012

| Feature         | 2002 |       |      |      |                   |                   |
|-----------------|------|-------|------|------|-------------------|-------------------|
|                 | Blue | Green | Red  | NIR  | SWIR <sub>1</sub> | SWIR <sub>2</sub> |
| Vegetation (NE) | 32.9 | 30.6  | 34.1 | 27.8 | 46.7              | 29.0              |
| Soil (NE)       | 46.3 | 43.1  | 52.5 | 32.9 | 65.5              | 51.8              |
| Vegetation (N)  | 30.6 | 25.5  | 27.8 | 24.3 | 44.7              | 29.4              |
| Soil (N)        | 32.9 | 28.6  | 33.3 | 25.1 | 52.2              | 37.6              |
| Vegetation (NW) | 31.8 | 27.8  | 32.2 | 26.7 | 45.5              | 30.2              |
| Soil (NW)       | 35.3 | 32.9  | 40.4 | 27.8 | 57.6              | 41.6              |

  

| Feature         | 2012 |       |      |      |                   |                   |
|-----------------|------|-------|------|------|-------------------|-------------------|
|                 | Blue | Green | Red  | NIR  | SWIR <sub>1</sub> | SWIR <sub>2</sub> |
| Vegetation (NE) | 29.8 | 25.9  | 29.0 | 26.7 | 43.1              | 26.7              |
| Soil (NE)       | 39.6 | 36.9  | 44.3 | 29.0 | 67.1              | 52.5              |
| Vegetation (N)  | 29.4 | 23.9  | 24.7 | 24.3 | 40.8              | 24.3              |
| Soil (N)        | 31.4 | 28.2  | 32.5 | 26.7 | 50.2              | 34.1              |
| Vegetation (NW) | 30.6 | 26.7  | 27.8 | 25.9 | 40.8              | 25.5              |
| Soil (NW)       | 33.3 | 31.4  | 37.6 | 27.1 | 52.9              | 38.4              |

Table S4 Percentage reflectance of vegetation and soil at a 1 km distance in different directions of AWP in 2018, 2020, and 2022

| Feature         | 2018 |       |      |      |                   |                   |
|-----------------|------|-------|------|------|-------------------|-------------------|
|                 | Blue | Green | Red  | NIR  | SWIR <sub>1</sub> | SWIR <sub>2</sub> |
| Vegetation (NE) | 50.6 | 54.1  | 51.8 | 83.1 | 51.0              | 50.2              |
| Soil (NE)       | 86.3 | 83.9  | 87.5 | 62.4 | 94.1              | 89.8              |
| Vegetation (N)  | 62.7 | 65.1  | 60.8 | 83.1 | 68.6              | 67.1              |
| Soil (N)        | 75.3 | 72.9  | 73.3 | 70.6 | 79.6              | 78.0              |
| Vegetation (NW) | 59.6 | 56.1  | 53.7 | 87.1 | 52.5              | 52.5              |
| Soil (NW)       | 86.3 | 88.6  | 88.2 | 93.7 | 89.8              | 84.7              |

  

| Feature         | 2020 |       |      |      |                   |                   |
|-----------------|------|-------|------|------|-------------------|-------------------|
|                 | Blue | Green | Red  | NIR  | SWIR <sub>1</sub> | SWIR <sub>2</sub> |
| Vegetation (NE) | 54.5 | 58.0  | 58.0 | 86.7 | 56.5              | 52.9              |
| Soil (NE)       | 98.8 | 98.4  | 98.0 | 97.6 | 99.2              | 98.4              |
| Vegetation (N)  | 58.4 | 58.0  | 58.0 | 90.6 | 55.7              | 55.7              |
| Soil (N)        | 70.6 | 73.3  | 71.8 | 70.6 | 76.1              | 74.5              |
| Vegetation (NW) | 67.8 | 67.8  | 62.0 | 93.7 | 62.0              | 63.5              |

|                 |      |       |      |      |                   |                   |
|-----------------|------|-------|------|------|-------------------|-------------------|
| Soil (NW)       | 97.3 | 98.4  | 98.8 | 98.8 | 98.4              | 97.3              |
| 2022            |      |       |      |      |                   |                   |
| Feature         | Blue | Green | Red  | NIR  | SWIR <sub>1</sub> | SWIR <sub>2</sub> |
| Vegetation (NE) | 49.0 | 45.5  | 39.6 | 60.0 | 44.3              | 25.5              |
| Soil (NE)       | 67.8 | 65.1  | 62.7 | 67.5 | 70.2              | 46.7              |
| Vegetation (N)  | 49.0 | 44.7  | 39.2 | 56.1 | 44.3              | 26.3              |
| Soil (N)        | 51.8 | 48.6  | 44.7 | 58.0 | 51.0              | 31.4              |
| Vegetation (NW) | 48.6 | 43.5  | 36.9 | 58.4 | 41.6              | 24.7              |
| Soil (NW)       | 55.3 | 53.7  | 51.4 | 62.7 | 57.3              | 36.1              |

Table S5 Percentage reflectance of vegetation and soil at a 5 km distance in different directions of AWP in 2002 and 2012

|                 |      |       |      |      |                   |                   |
|-----------------|------|-------|------|------|-------------------|-------------------|
| 2002            |      |       |      |      |                   |                   |
| Feature         | Blue | Green | Red  | NIR  | SWIR <sub>1</sub> | SWIR <sub>2</sub> |
| Vegetation (NE) | 35.3 | 32.9  | 37.6 | 28.6 | 60.8              | 47.1              |
| Soil (NE)       | 37.3 | 32.9  | 38.8 | 28.2 | 59.2              | 46.7              |
| Vegetation (N)  | 31.4 | 27.8  | 32.2 | 24.7 | 47.1              | 30.2              |
| Soil (N)        | 32.2 | 27.5  | 32.2 | 22.0 | 48.2              | 34.9              |
| Vegetation (NW) | 32.2 | 28.6  | 33.3 | 26.7 | 49.4              | 35.3              |
| Soil (NW)       | 34.9 | 30.6  | 36.1 | 26.3 | 53.3              | 39.2              |
| 2012            |      |       |      |      |                   |                   |
| Feature         | Blue | Green | Red  | NIR  | SWIR <sub>1</sub> | SWIR <sub>2</sub> |
| Vegetation (NE) | 30.6 | 25.9  | 27.1 | 25.5 | 41.2              | 24.7              |
| Soil (NE)       | 31.8 | 27.5  | 30.6 | 25.1 | 49.4              | 33.7              |
| Vegetation (N)  | 29.8 | 26.3  | 28.6 | 25.9 | 41.2              | 25.1              |
| Soil (N)        | 33.7 | 29.8  | 35.3 | 25.5 | 53.3              | 36.5              |
| Vegetation (NW) | 29.8 | 24.7  | 26.3 | 25.5 | 40.8              | 24.7              |
| Soil (NW)       | 35.3 | 31.4  | 38.4 | 26.7 | 54.1              | 43.1              |

Table S6 Percentage reflectance of vegetation and soil at a 5 km distance in different directions of AWP in 2018, 2020, and 2022

|                 |      |       |      |      |                   |                   |
|-----------------|------|-------|------|------|-------------------|-------------------|
| 2018            |      |       |      |      |                   |                   |
| Feature         | Blue | Green | Red  | NIR  | SWIR <sub>1</sub> | SWIR <sub>2</sub> |
| Vegetation (NE) | 52.5 | 60.4  | 51.0 | 95.7 | 51.0              | 51.4              |
| Soil (NE)       | 91.4 | 96.1  | 94.1 | 98.8 | 96.1              | 96.1              |
| Vegetation (N)  | 56.9 | 60.4  | 56.5 | 96.5 | 56.5              | 53.3              |
| Soil (N)        | 89.4 | 92.5  | 92.9 | 92.9 | 92.2              | 89.8              |
| Vegetation (NW) | 47.1 | 47.8  | 48.2 | 95.7 | 46.7              | 46.7              |
| Soil (NW)       | 75.3 | 70.2  | 74.9 | 57.6 | 68.6              | 71.4              |
| 2020            |      |       |      |      |                   |                   |
| Feature         | Blue | Green | Red  | NIR  | SWIR <sub>1</sub> | SWIR <sub>2</sub> |

|                 |      |      |      |      |      |      |
|-----------------|------|------|------|------|------|------|
| Vegetation (NE) | 54.5 | 62.0 | 58.0 | 79.6 | 51.0 | 48.6 |
| Soil (NE)       | 72.9 | 75.3 | 70.2 | 72.9 | 76.1 | 74.5 |
| Vegetation (N)  | 52.9 | 53.7 | 53.7 | 85.1 | 50.2 | 51.4 |
| Soil (N)        | 72.9 | 75.3 | 75.7 | 70.6 | 71.8 | 71.8 |
| Vegetation (NW) | 54.5 | 53.7 | 50.6 | 70.6 | 51.0 | 50.2 |
| Soil (NW)       | 63.1 | 63.9 | 64.7 | 52.5 | 63.9 | 63.5 |

  

| Feature         | 2022 |       |      |      |                   |                   |
|-----------------|------|-------|------|------|-------------------|-------------------|
|                 | Blue | Green | Red  | NIR  | SWIR <sub>1</sub> | SWIR <sub>2</sub> |
| Vegetation (NE) | 47.8 | 44.7  | 37.3 | 55.7 | 38.8              | 22.7              |
| Soil (NE)       | 53.7 | 51.0  | 46.3 | 55.7 | 51.4              | 32.5              |
| Vegetation (N)  | 48.2 | 43.1  | 39.6 | 57.6 | 42.0              | 24.7              |
| Soil (N)        | 54.5 | 51.4  | 47.8 | 58.0 | 52.9              | 33.7              |
| Vegetation (NW) | 49.4 | 44.7  | 40.0 | 58.4 | 44.3              | 26.3              |
| Soil (NW)       | 51.0 | 46.7  | 42.4 | 54.1 | 47.5              | 29.0              |

Table S7 Percentage reflectance of vegetation and soil at a 10 km distance in different directions of AWP in 2002 and 2012

| Feature         | 2002 |       |      |      |                   |                   |
|-----------------|------|-------|------|------|-------------------|-------------------|
|                 | Blue | Green | Red  | NIR  | SWIR <sub>1</sub> | SWIR <sub>2</sub> |
| Vegetation (NE) | 28.2 | 23.1  | 24.3 | 24.7 | 38.8              | 23.5              |
| Soil (NE)       | 35.7 | 31.8  | 39.6 | 27.8 | 68.6              | 51.8              |
| Vegetation (N)  | 31.4 | 25.9  | 27.5 | 25.1 | 44.7              | 31.0              |
| Soil (N)        | 32.2 | 27.5  | 31.4 | 22.0 | 48.2              | 33.7              |
| Vegetation (NW) | 27.8 | 22.4  | 27.5 | 26.3 | 37.6              | 21.6              |
| Soil (NW)       | 35.3 | 31.4  | 36.5 | 25.9 | 49.8              | 38.4              |

  

| Feature         | 2012 |       |      |      |                   |                   |
|-----------------|------|-------|------|------|-------------------|-------------------|
|                 | Blue | Green | Red  | NIR  | SWIR <sub>1</sub> | SWIR <sub>2</sub> |
| Vegetation (NE) | 29.0 | 23.5  | 23.9 | 24.3 | 40.0              | 24.7              |
| Soil (NE)       | 30.6 | 25.1  | 27.8 | 22.4 | 43.1              | 26.7              |
| Vegetation (N)  | 29.0 | 23.9  | 24.3 | 24.7 | 41.2              | 27.8              |
| Soil (N)        | 32.9 | 28.2  | 31.4 | 27.1 | 51.4              | 38.8              |
| Vegetation (NW) | 30.6 | 24.3  | 26.3 | 24.3 | 41.2              | 23.9              |
| Soil (NW)       | 35.3 | 29.8  | 35.7 | 26.7 | 51.8              | 38.0              |

Table S8 Percentage reflectance of vegetation and soil at a 10 km distance in different directions of AWP in 2018, 2020, and 2022

| Feature         | 2018 |       |      |      |                   |                   |
|-----------------|------|-------|------|------|-------------------|-------------------|
|                 | Blue | Green | Red  | NIR  | SWIR <sub>1</sub> | SWIR <sub>2</sub> |
| Vegetation (NE) | 50.6 | 51.4  | 49.4 | 88.6 | 48.2              | 47.5              |
| Soil (NE)       | 69.0 | 75.3  | 81.2 | 74.9 | 71.0              | 64.7              |
| Vegetation (N)  | 47.5 | 47.8  | 46.7 | 83.1 | 50.6              | 49.4              |

|                 |      |      |      |      |      |      |
|-----------------|------|------|------|------|------|------|
| Soil (N)        | 62.7 | 65.1 | 60.8 | 68.2 | 69.8 | 68.2 |
| Vegetation (NW) | 47.1 | 47.5 | 48.2 | 85.1 | 47.8 | 47.1 |
| Soil (NW)       | 72.2 | 67.8 | 76.5 | 72.5 | 71.0 | 71.4 |

2020

| Feature         | Blue | Green | Red  | NIR  | SWIR <sub>1</sub> | SWIR <sub>2</sub> |
|-----------------|------|-------|------|------|-------------------|-------------------|
| Vegetation (NE) | 47.1 | 47.1  | 46.7 | 66.3 | 46.7              | 46.7              |
| Soil (NE)       | 70.6 | 76.9  | 79.6 | 85.1 | 83.9              | 71.8              |
| Vegetation (N)  | 54.5 | 52.2  | 49.4 | 75.3 | 52.9              | 54.5              |
| Soil (N)        | 51.4 | 52.2  | 49.8 | 49.4 | 52.9              | 51.8              |
| Vegetation (NW) | 47.5 | 49.4  | 49.4 | 94.5 | 48.2              | 48.2              |
| Soil (NW)       | 56.5 | 56.5  | 52.9 | 52.5 | 54.1              | 53.7              |

2022

| Feature         | Blue | Green | Red  | NIR  | SWIR <sub>1</sub> | SWIR <sub>2</sub> |
|-----------------|------|-------|------|------|-------------------|-------------------|
| Vegetation (NE) | 47.5 | 43.1  | 36.1 | 52.2 | 40.8              | 23.9              |
| Soil (NE)       | 48.2 | 43.1  | 36.9 | 50.2 | 42.4              | 25.5              |
| Vegetation (N)  | 47.5 | 42.7  | 36.1 | 53.7 | 43.5              | 25.5              |
| Soil (N)        | 50.6 | 46.7  | 43.1 | 51.8 | 49.0              | 30.2              |
| Vegetation (NW) | 47.8 | 43.1  | 38.0 | 59.6 | 40.8              | 23.5              |
| Soil (NW)       | 69.4 | 65.9  | 64.3 | 68.2 | 64.7              | 44.7              |
